# Supplementary material for: Surface Plasmon Resonance, Formation Mechanism, and Surface Enhanced Raman Spectroscopy of Ag+-Stained Gold Nanoparticles
Source: Front Chem. 2019 Feb 14;7:27. doi: 10.3389/fchem.2019.00027 (PMC6382679; doi:10.3389/fchem.2019.00027)
Supplement: Supplementary file 1 [file Data_Sheet_1.docx]

Supporting Information

Surface Plasmon Resonance, Formation Mechanism, and Surface enhanced Raman Spectroscopy of Ag+-Stained Gold Nanoparticles

*Sumudu Athukorale,1 Xue Leng, 2 Joanna Xiuzhu Xu,1 Y. Randika Perera,1 Nicholas Fitzkee,1 and Dongmao Zhang, 1,3,**

1Department of Chemistry, Mississippi State University, Starkville, MS, United States.

*2*Department of Chemistry, Chengdu University of Technology, Chengdu, China

*3*Department of Chemistry, Xihua University, Chengdu, China.

**Corresponding author: Email:* [*Dongmao@chemistry.msstate.edu*](mailto:Dongmao@chemistry.msstate.edu)

*Fax: 662-325-1618*

Content Page No.

S1. UV-vis spectra for the Ag+ treated AuNPs with and without dialysis purification...........S3

S2. Example PRS2 data analysis of AuNPs treated with 150 µM AgNO3………..….………S4

S3. The empirical fitting of the kinetic data for the adsorption of Ag+ onto

13-nm AuNPs…………………………………………………………………...………..S5

S4. Photograph and UV-vis spectra showing the formation of Ag-citrate salt……………....S6

**S1. UV-vis spectra for the Ag+ treated AuNPs with and without dialysis purification.**


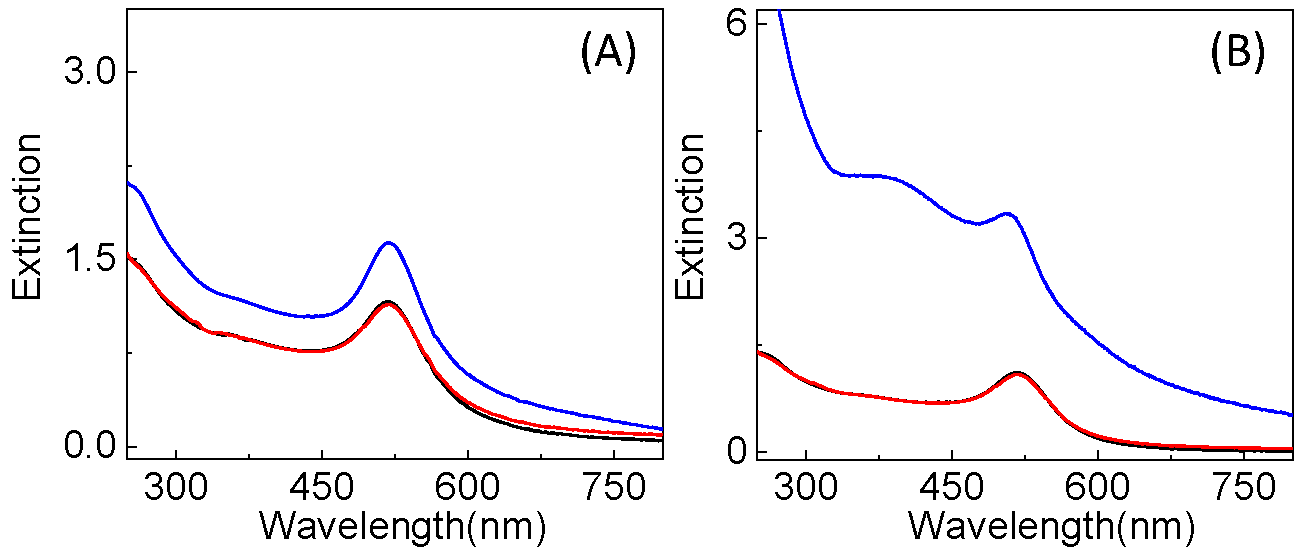


**Figure S1.** UV-vis spectra for the Ag+ treated (A) dialyzed and (B) as-synthesized AuNPs. (black) AuNP control spectrum (red) AuNP/KNO3 control spectrum (blue) AuNP/AgNO3 spectrum. The nominal concentration of KNO3 and AgNO3 is 2.5 mM.

**S2. Example PRS2 data analysis of AuNPs treated with 150 µM AgNO3**

**Figure S2**. (A) UV-vis extinction spectrum of AuNPs treated with 150 µM AgNO3. (B) As-acquired PRS2 solution spectra with excitation and emission polarization combination of (red) VV and (black) VH. (C) Solvent PRS2 VV and VH spectra. (D) Inner-filter-effect corrected PRS2 spectra of the (B) as-acquired spectra using its (A) UV-vis spectra. (D) AuNP specific PRS2 spectra obtained by subtracting (C) solvent background spectra from (C) IFE corrected spectra. (E) G factor spectrum of the spectrofluorometer used for spectral acquisitions. (F) Scattering depolarization spectrum of AuNP (G) Scattering cross-section spectrum of PSNP used as the external reference for the analyte cross-section quantification. The inset is the UV-vis extinction spectrum of PSNP that used to calculate its scattering cross-sections. (H) PRS2 spectra of PSNP that shows PSNP has a depolarization of 0. (I) (red) Extinction cross-section spectrum and (black) absorption cross-section spectrum of AuNP quantified by subtracting the scattering cross-section spectrum from its extinction cross-section spectrum. (J) Scattering cross-section spectra of AuNP calculated with equation . (K) Scattering-to-extinction spectrum (S/E) of AuNP calculated by dividing scattering cross-section spectrum by its extinction cross-section spectrum.

**S3. The empirical fitting of the kinetic data for the adsorption of Ag+ onto 13-nm AuNPs.**


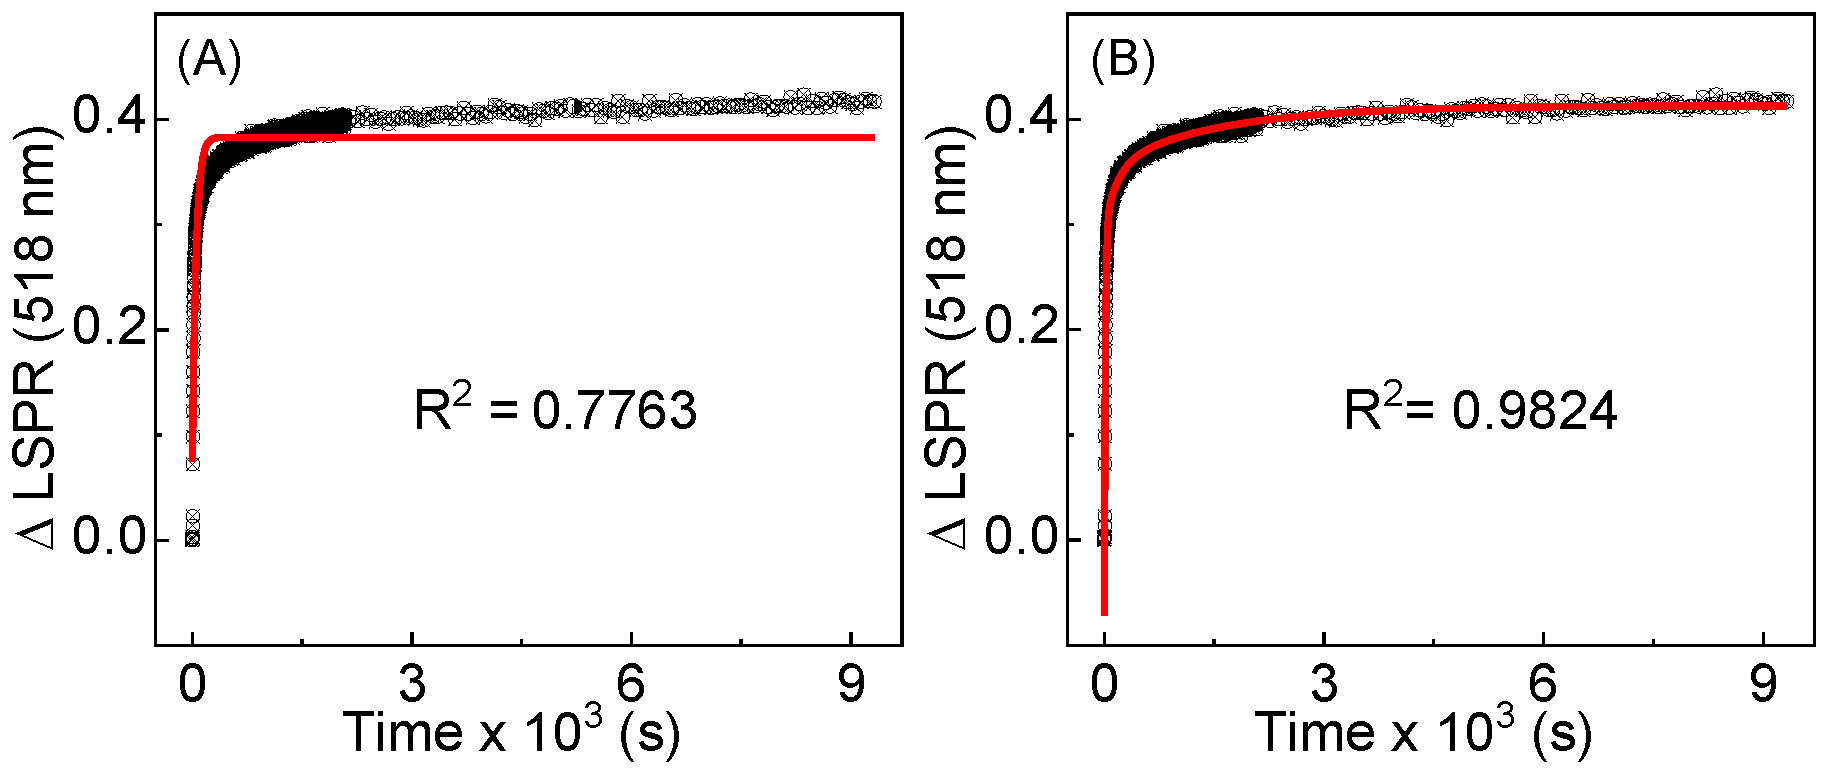


**Figure S3.** Empirical fitting of the time-course of the time-resolved UV-vis spectra with (A) one-pseudo-first-order kinetics () (B) two-pseudo-first-order equation (). The nominal concentration of Ag+ is 100 µM.

**S4. Photograph and UV-vis spectra showing the formation of Ag-citrate salt.**


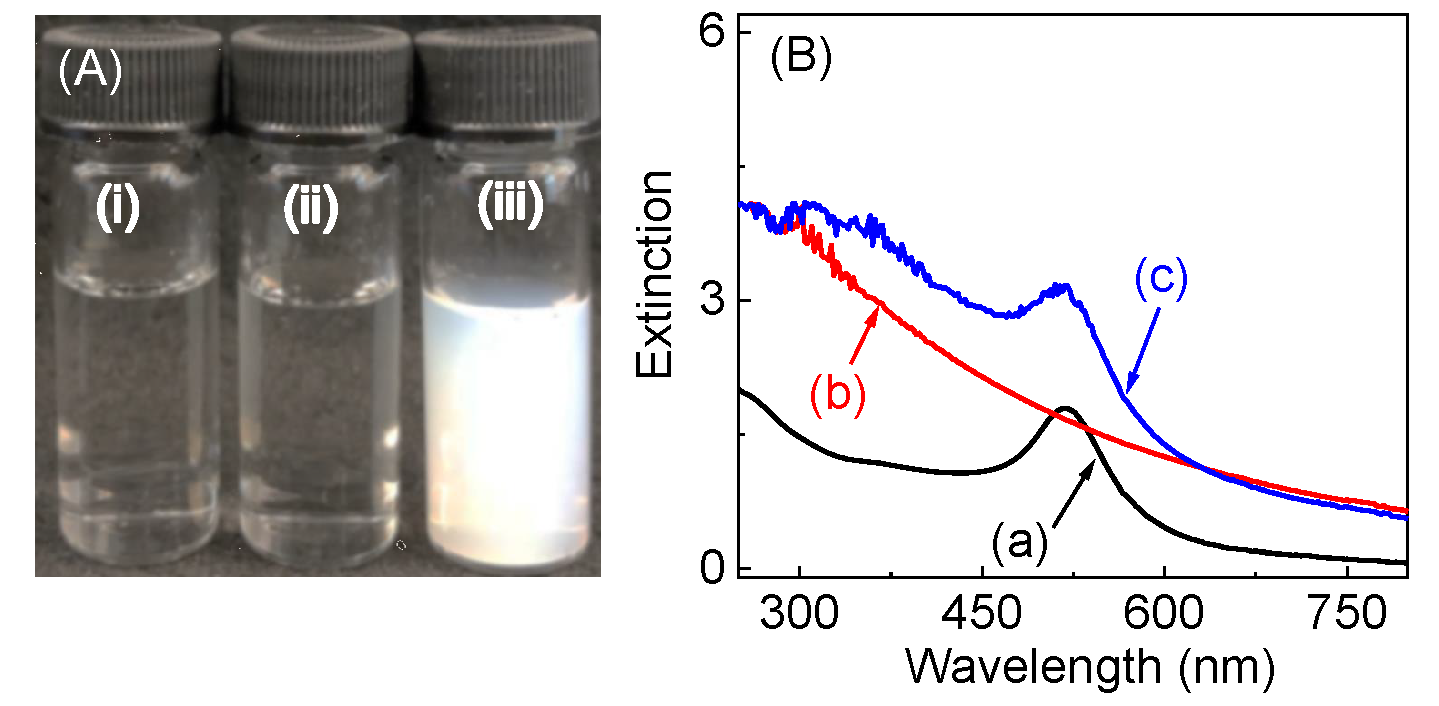


**Figure S4.** (A) Photograph of (i) citrate solution, (ii) KNO3/citrate, (iii) AgNO3/citrate. Nominal concentration of citrate, KNO3, and AgNO3 are 4 mM, 12 mM and 12 mM respectively. (B) UV-vis spectra obtained for (a) dialyzed AuNPs/AgNO3, (b) as-synthesized AuNP supernatant/AgNO3. (c) (as-synthesized AuNP supernatant/AgNO3)/dialyzed AuNPs. Nominal concentration of AgNO3 is 2.5 mM. The shape of the spectrum indicates that there are insoluble particles formed by Ag+ reacting with excess citrate and chloride in the AuNP centrifugation supernatant.
